# Supplementary material for: Structural Basis for Membrane Targeting and Secretion of Legionella SidE Ubiquitin Ligases
Source: Research Square preprint supplement (doi:10.21203/rs.3.rs-6524297/v1), 2025-05-13
Supplement: Supplementary file 1 [file 59fd05ea7cb4689e96012561.xlsx]

## Sheet: liposome composition
Supplementary Data 1: Liposome composition for LiMA.
In total, 46 lipid mixtures were used for the liposome microarrays. In the lipid mixtures, 18:1 (Δ9-Cis) PC (DOPC) or 16:0-18:1 PC (POPC) is used as a carrier lipid, complemented with 10 mol% of signaling lipid ± 10 mol% PS. In addition, lipid mixtures mimicking the organellar membranes of a cell were included. Each lipid mixture contained a PEGylated lipid and fluorescent lipid. The correspondin…
						Lipid concentration (mol%)
ID liposome	Carrier lipid	Signalling lipid 1	Signalling lipid 2	Signalling lipid 3	Signalling lipid 4	Carrier lipid 18:1 (Δ9-Cis) PC (DOPC)	Carrier lipid 16:0-18:1 PC (POPC)	Signalling lipid 1	Signalling lipid 2	Signalling lipid 3	Signalling lipid 4	PEGylated lipid 18:1 PE-PEG350	Fluorescent lipid 18:1 PE-Atto647N
DOPC	18:1 PC					100						0.4	0.1
DOPC-DOPI	18:1 PC	18:1 PI				90		10				0.4	0.1
DOPC-DOPI3P	18:1 PC	18:1 PI(3)P				90		10				0.4	0.1
DOPC-PI4P	18:1 PC	Brain PI(4)P				90		10				0.4	0.1
DOPC-DOPI5P	18:1 PC	18:1 PI(5)P				90		10				0.4	0.1
DOPC-DOPI34P2	18:1 PC	18:1 PI(3,4)P2				90		10				0.4	0.1
DOPC-DOPI35P2	18:1 PC	18:1 PI(3,5)P2				90		10				0.4	0.1
DOPC-PI45P2	18:1 PC	Brain PI(4,5)P2				90		10				0.4	0.1
DOPC-DOPI345P3	18:1 PC	18:1 PI(3,4,5)P3				90		10				0.4	0.1
DOPC-DOPE	18:1 PC	18:1 PE				90		10				0.4	0.1
DOPC-CL	18:1 PC	18:1 CL				90		10				0.4	0.1
DOPC-DOPA	18:1 PC	18:1 PA				90		10				0.4	0.1
DOPC-DOPS	18:1 PC	18:1 PS				90		10				0.4	0.1
DOPC-DOPI3P-PS	18:1 PC	18:1 PI(3)P	18:1 PS			80		10	10			0.4	0.1
DOPC-PI4P-PS	18:1 PC	Brain PI(4)P	18:1 PS			80		10	10			0.4	0.1
DOPC-DOPI5P-PS	18:1 PC	18:1 PI(5)P	18:1 PS			80		10	10			0.4	0.1
DOPC-DOPI34P2-PS	18:1 PC	18:1 PI(3,4)P2	18:1 PS			80		10	10			0.4	0.1
DOPC-DOPI35P2-PS	18:1 PC	18:1 PI(3,5)P2	18:1 PS			80		10	10			0.4	0.1
DOPC-PI45P2-PS	18:1 PC	Brain PI(4,5)P2	18:1 PS			80		10	10			0.4	0.1
DOPC-DOPI345P3-PS	18:1 PC	18:1 PI(3,4,5)P3	18:1 PS			80		10	10			0.4	0.1
POPC	16:0-18:1 PC	18:1 CL					100					0.4	0.1
POPC-DOPI	16:0-18:1 PC	18:1 PI					90	10				0.4	0.1
POPC-DOPI3P	16:0-18:1 PC	18:1 PI(3)P					90	10				0.4	0.1
POPC-PI4P	16:0-18:1 PC	Brain PI(4)P					90	10				0.4	0.1
POPC-DOPI5P	16:0-18:1 PC	18:1 PI(5)P					90	10				0.4	0.1
POPC-DOPI34P2	16:0-18:1 PC	18:1 PI(3,4)P2					90	10				0.4	0.1
POPC-DOPI35P2	16:0-18:1 PC	18:1 PI(3,5)P2					90	10				0.4	0.1
POPC-PI45P2	16:0-18:1 PC	Brain PI(4,5)P2					90	10				0.4	0.1
POPC-DOPI345P3	16:0-18:1 PC	18:1 PI(3,4,5)P3					90	10				0.4	0.1
POPC-DOPE	16:0-18:1 PC	18:1 PE					90	10				0.4	0.1
POPC-CL	16:0-18:1 PC	18:1 CL					90	10				0.4	0.1
POPC-DOPA	16:0-18:1 PC	18:1 PA					90	10				0.4	0.1
POPC-DOPS	16:0-18:1 PC	18:1 PS					90	10				0.4	0.1
POPC-DOPI3P-PS	16:0-18:1 PC	18:1 PI(3)P					80	10	10			0.4	0.1
POPC-PI4P-PS	16:0-18:1 PC	Brain PI(4)P					80	10	10			0.4	0.1
POPC-DOPI5P-PS	16:0-18:1 PC	18:1 PI(5)P					80	10	10			0.4	0.1
POPC-DOPI34P2-PS	16:0-18:1 PC	18:1 PI(3,4)P2					80	10	10			0.4	0.1
POPC-DOPI35P2-PS	16:0-18:1 PC	18:1 PI(3,5)P2					80	10	10			0.4	0.1
POPC-PI45P2-PS	16:0-18:1 PC	Brain PI(4,5)P2					80	10	10			0.4	0.1
POPC-DOPI345P3-PS	16:0-18:1 PC	18:1 PI(3,4,5)P3					80	10	10			0.4	0.1
ER (endoplasmic reticulum) mimic	18:1 PC	18:1 PE	18:1 PI	18:1 PS	cholesterol	60		20	10	5	5	0.4	0.1
IMM (inner mitochondrial membrane) mimic	18:1 PC	18:1 PE	18:1 PI	18:1 CL		40		40	5	14		0.4	0.1
OMM (outer mitochondrial membrane) mimic	18:1 PC	18:1 PE	18:1 PI	18:1 PS	18:1 CL	50		30	10	5	5	0.4	0.1
Golgi mimic	16:0-18:1 PC	16:0-18:1 PE	18:1 PI	16:0-18:1 PS	cholesterol		50	19	10	5	16	0.4	0.1
outer PM (plasma membrane) mimic	16:0-18:1 PC	18:1 SM	cholesterol				33	33	33			0.4	0.1
inner PM (plasma membrane) mimic	16:0-18:1 PC	16:0-18:1 PE	cholesterol	16:0-18:1 PS			32	12	37	19		0.4	0.1
